# Supplementary material
Source: publisher site journal article supplement (https://www.dovepress.com/article/493246)
Supplement: Supplementary file 1 [file get_supplementary_file.php]

**Appendix 1: Referrals according to referral status across the five BUs and 13 administrative areas of Saudi Arabia**

| Business Units | | Total  N (%)  9,722 (100) | Rejected  N (%)  1,701 (17.50) | Accepted  N (%)  8,021 (82.50) | P-value |
| --- | --- | --- | --- | --- | --- |
| Central | | 1,100(11.31) | 304(27.64) | 796(72.36) | < 0.001 *** |
| Eastern | | 1,178(12.12) | 181(15.37) | 997(84.63) |
| Western | | 4,386(45.11) | 787(17.94) | 3599(82.06) |
| Northern | | 1,548(15.92) | 118(7.62) | 1430(92.38) |
| Southern | | 1,510(15.53) | 311(20.60) | 1199(79.40) |
| Business Units | Administrative area | Total  N (%)  9,722 (100) | Rejected  N (%)  1,701 (17.50) | Accepted  N (%)  8,021 (82.50) | P-value |
| Central | Riyadh | 659(6.78) | 190(28.83) | 469(71.17) | < 0.001 *** |
| AL Qassim | 441(4.54) | 114(25.85) | 327(74.15) |
| Western | Makkah | 2,441(25.11) | 411(16.84) | 2030(83.16) |
| Madinah | 1,662(17.10) | 272(16.37) | 1390(83.63) |
| Albaha | 283(2.91) | 104(36.75) | 179(63.25) |
| Eastern | Eastern region | 1,178(12.12) | 181(15.37) | 997(84.63) |
| Northern | Al-jouf | 148(1.52) | 35(23.65) | 113(76.35) |
| Northern Border | 724(7.45) | 31(4.28) | 693(95.72) |
| Tabuk | 222(2.28) | 19(8.56) | 203(91.44) |
| Hail | 454(4.67) | 33(7.27) | 421(92.73) |
| Southern | Aseer | 624(6.42) | 173(27.72) | 451(72.28) |
| Jazan | 498(5.12) | 129(25.90) | 369(74.10) |
| Najran | 388(3.99) | 9(2.32) | 379(97.68) |

*** significant difference at p < 0.001*.*
